# Supplementary material for: Functional Loss of Bmsei Causes Thermosensitive Epilepsy in Contractile Mutant Silkworm, Bombyx mori
Source: PubMed Central journal article supplement (PMC4510522; doi:10.1038/srep12308), 2015-07-22
Supplement: srep12308-s2.pdf [file srep12308-s2.pdf]

# **Functional Loss of *Bmsei* Causes Thermosensitive Epilepsy in Contractile Mutant**

**Silkworm, *Bombyx mori***

**Hong-Yi Nie<sup>1,2,3,4</sup>, Ting-Cai Cheng<sup>1,2,3</sup>, Xiao-Feng Huang<sup>1</sup>, Meng-Ting Zhou<sup>1</sup>, Yin-Xia**

**Zhang<sup>1</sup>, Fang-Yin Dai<sup>1,2,3</sup>, Kazuei Mita<sup>1</sup>, Qing-You Xia<sup>1,2,3\*</sup>, Chun Liu<sup>1,2,3\*</sup>**

<sup>1</sup>State Key Laboratory of Silkworm Genome Biology, Chongqing 400716, China

<sup>2</sup>the Key Sericultural Laboratory of the Ministry of Agriculture, Southwest University, Chongqing 400716, China

<sup>3</sup>College of Bio-Technology, Southwest University, Chongqing 400716, China

<sup>4</sup>College of Bee Science, Fujian Agriculture and Forestry University, Fujian Fuzhou 350002, China

\* To whom correspondence should be addressed: Chun Liu, State Key Laboratory of

Silkworm Genome Biology, Southwest University, Chongqing, 400716, China,

Tel.:+86-23-68251753, E-mail: mlliuchun@163.com. Qing-You Xia, State Key Laboratory of

Silkworm Genome Biology, Southwest University, Chongqing, China, Tel:+86-23-6825-1996;

Fax: 86-23-6825-1228; E-mail: xiaqy@swu.edu.cn

## Supplementary information, Figure S1

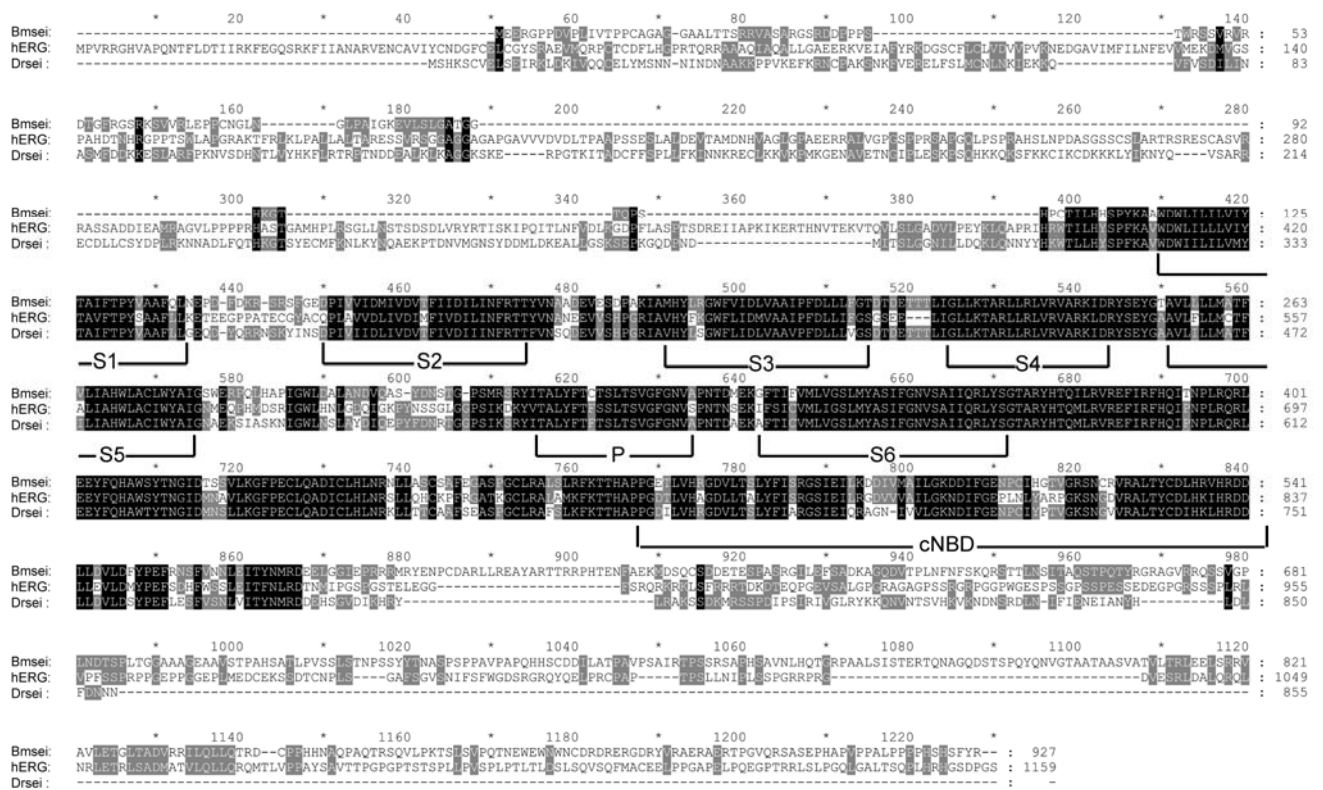

**Supplementary Figure 1** Amino acid sequence alignment of deduced Bmsei sequence with Drsei and hERG. Bmsei amino acid sequence compared with the HERG potassium channel subunit and seizure of *Drosophila* (Drsei). Underlined: six hydrophobic domains (S1–S6), pore (P), and cyclic nucleotide-binding domain (cNBD). Black, conserved residues; gray, residues common between two sequences.

## Supplementary information, Figure S2

```
cot: TCATCGCACATTGGCTGGCGTGTTTATGGTTAGTTAAACATAT-----CGGATAAATAGT
C108: TCATCGCACATTGGCTGGCGTGTTTATGGTTAGTTAAACATATGTATACACACGTATTCGGATAAATAGT
XF: TCATCGCACATTGGCTGGCGTGTTTATGGTTAGTTAAACATATGTATACACACGTATTCGGATAAATAGT
Bb: TCATCGCACATTGGCTGGCGTGTTTATGGTTAGTTAAACATATGTATACACACGTATTCGGATAAATAGT
Fl: TCATCGCACATTGGCTGGCGTGTTTATGGTTAGTTAAACATATGTATACACACGTATTCGGATAAATAGT
sch: TCATCGCACATTGGCTGGCGTGTTTATGGTTAGTTAAACATATGTATACACACGTATTCGGATAAATAGT
ve: TCATCGCACATTGGCTGGCGTGTTTATGGTTAGTTAAACATATGTATACACACGTATTCGGATAAATAGT
Nd: TCATCGCACATTGGCTGGCGTGTTTATGGTTAGTTAAACATATGTATACACACGTATTCGGATAAATAGT
q: TCATCGCACATTGGCTGGCGTGTTTATGGTTAGTTAAACATATGTATACACACGTATTCGGATAAATAGT
pS: TCATCGCACATTGGCTGGCGTGTTTATGGTTAGT-AAACATAT-GTATACACACGTATTCGGATAAATAGT
nb: TCATCGCACATTGGCTGGCGTGTTTATGGTTAGTTAAACATATGTATACACACGTATTCGGATAAATAGT
M3: TCATCGCACATTGGCTGGCGTGTTTATGGTTAGTTAAACATATGTATACACACGTATTCGGATAAATAGT
```

**Supplementary Figure 2** Multiple sequence alignment of the fifth intron of *Bmsei* from 12 silkworm strains. Region harboring the 15 bp sequence in the fifth intron of *Bmsei* amplified by PCR using 12 genomic DNAs including from *cot* mutant. PCR products were sequenced. The 15 bp deletion was unique to *cot* mutants. Strains: contractile (*cot*), *C108*, Xiafang (*XF*), Bibo (*Bb*), Flossy (*Fl*), sex-linked chocolate (*sch*), varnished eye (*ve*), quail (*q*), Striped (*p<sup>S</sup>*), narrow breast (*nb*), *M<sup>3</sup>*.

Supplementary information, Figure S3

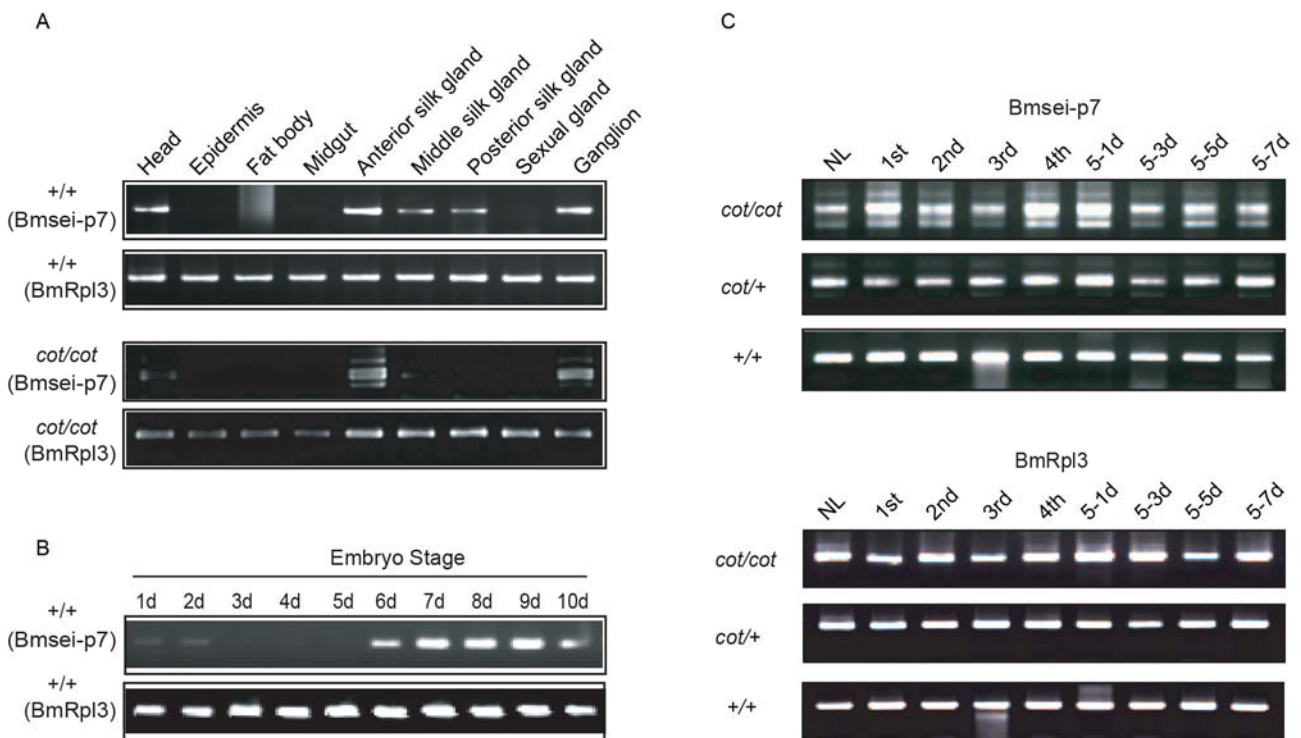

**Supplementary Figure 3** Expression patterns of *Bmsei* by RT-PCR. (A) Spatial expression of *Bmsei* on day 5 of the fifth instar larval stage in *+/+* and *cot/cot*. (B) Expression profile of *Bmsei* in the embryo stage in wild type. (C) Expression profile of *Bmsei* in larvae at different stages and three genotypes, *cot/cot*, *cot/+* and *+/+* (Dazao). Developmental stages: NL, neonate larvae; 1 st, day 1 of first instar; 2 nd, day 1 of second instar; 3 rd, day 1 of third instar; 4 th, day 1 of fourth instar; 5-1 d, day 1 of fifth instar; 5-3 d, day 3 of fifth instar; 5-5 d, day 5 of fifth instar; 5-7 d, day 7 of fifth instar.

Supplementary information, Figure S4

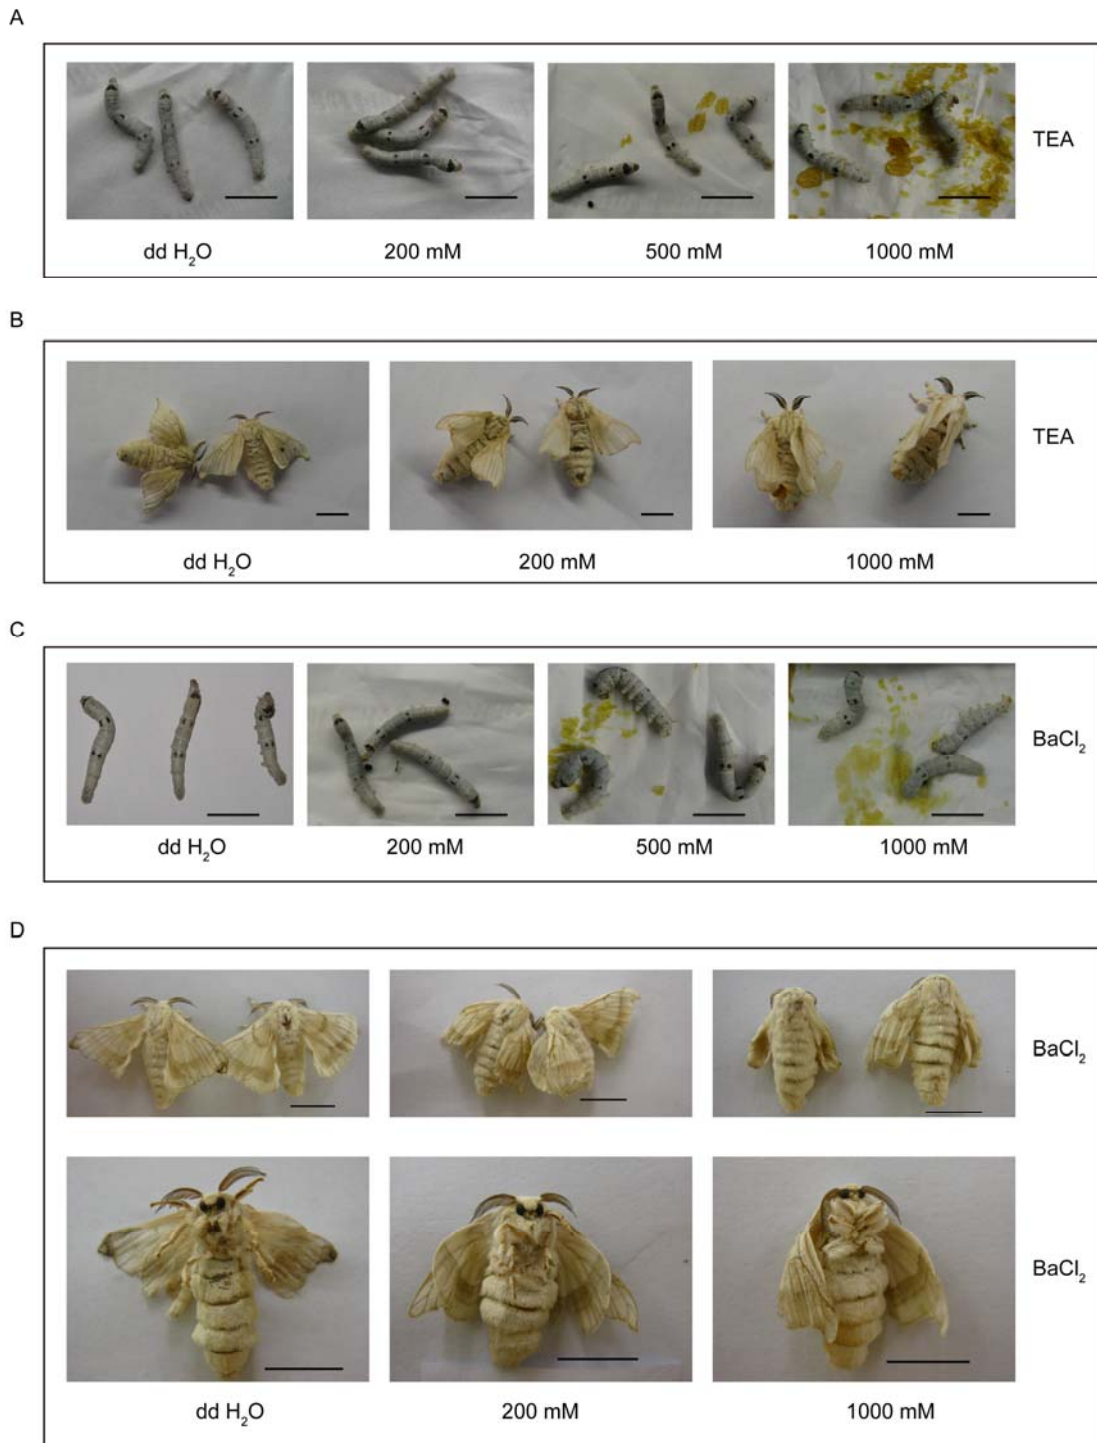

**Supplementary Figure 4** Phenotype of WT with TEA and BaCl<sub>2</sub> treatment of larvae and moths. (A and C) WT larvae were injected with 0 mM, 200 mM, 500 mM, or 1000 mM TEA (upper) or BaCl<sub>2</sub> (lower). (B and D) Moths were injected with 0 mM, 200 mM, 1000 mM TEA (upper) or BaCl<sub>2</sub> (lower). Scale bar, 1 cm.

Supplementary information, Figure S5

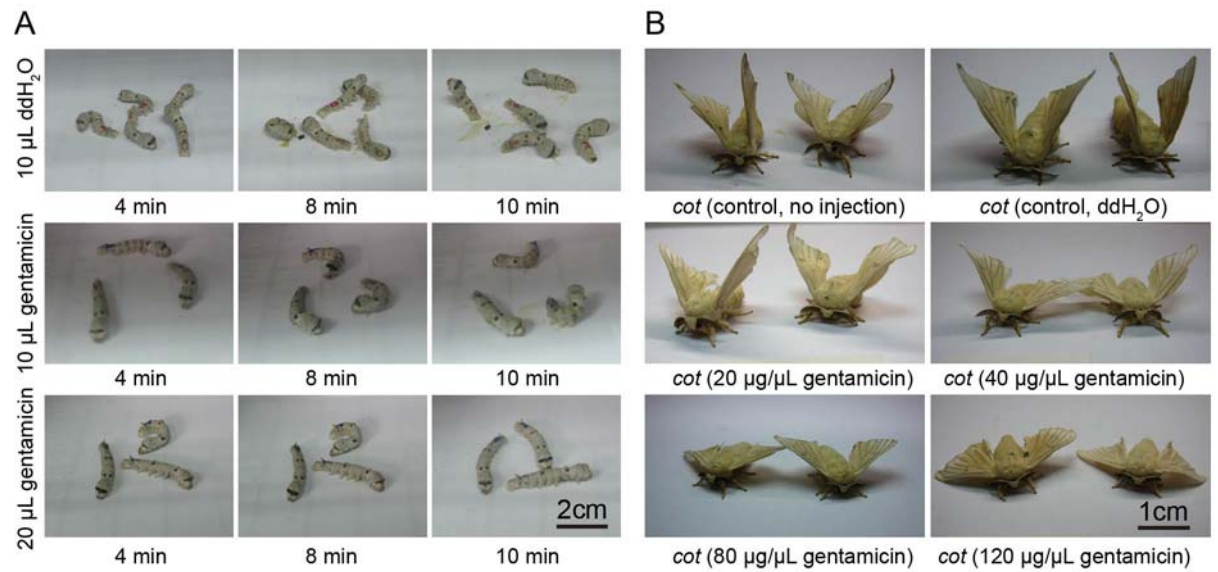

**Supplementary Figure 5** Gentamicin partly rescues the *cot* phenotype. (A) Phenotype of larva (day 2 of fifth instar) injected with different gentamicin dose when treated with high temperature at 35 °C. Larva were injected 10 µL ddH<sub>2</sub>O (upper panel), 10 µL gentamicin (40 µg/µL, middle panel) and 20 µL gentamicin (40 µg/µL, lower panel,) on day 2 of fifth instar. Then the phenotypes were observed at 4 min, 8 min and 10 min after treated with high temperature at 35 °C. (B) Gentamicin at different concentrations (20 µg/µL, 40 µg/µL, 80 µg/µL and 120 µg/µL) was injected into contractile mutants and treated at 42°C.

## Supplementary information, Table S1 List of ten candidate genes' domain and function

| Gene          | Number of amino acid | Domain                                                                              | Function                                                                                                                             |
|---------------|----------------------|-------------------------------------------------------------------------------------|--------------------------------------------------------------------------------------------------------------------------------------|
| BGIBMGA007797 | 566                  | Zinc finger                                                                         | Contain multiple finger-like protrusions and make tandem contacts with their target molecule                                         |
| BGIBMGA007730 | 1357                 | Protein kinase domain<br>CNH domain                                                 | Phosphorylation, embryonic development, physiological responses and in the nervous and immune system;<br>Macromolecular interactions |
| BGIBMGA007796 | 132                  | Prefoldin_2                                                                         | Interacts exclusively with type II chaperonins, hetero-oligomers                                                                     |
| BGIBMGA007731 | 304                  | No                                                                                  | /                                                                                                                                    |
| BGIBMGA007795 | 113                  | Ribosomal protein<br>L7Ae/L30e/S12e/Gadd45 family                                   | Catalyse mRNA-directed protein synthesis in all organisms                                                                            |
| BGIBMGA007732 | 232                  | Protein tyrosine phosphatase                                                        | Remove phosphate groups from phosphorylated tyrosine residues on proteins                                                            |
| BGIBMGA007733 | 486                  | No                                                                                  | /                                                                                                                                    |
| BGIBMGA007734 | 428                  | Bystin<br>Transmembrane ion channel family;                                         | Implantation and trophoblast invasion<br>The family of tetrameric sodium, potassium and calcium ion channels;                        |
| BGIBMGA007794 | 898                  | Cyclic nucleotide-binding domain                                                    | Binding cyclic nucleotides (cAMP or cGMP)                                                                                            |
| BGIBMGA007735 | 1167                 | Transmembrane domain of ABC transporters;<br>ATP-binding domain of ABC transporters | Transmembrane structural unit of ATP-binding cassette transporter;<br>Exporting or importing of a wide variety of substrates         |

Note: Number of amino acid, Domain and Function for each gene is shown based on the silkDB

(<http://silkworm.swu.edu.cn/silkdb/>) and Pfam blast on line. "NO" indicates that the gene didn't contain any domain, and the virgule indicates no report of the function.

**Supplementary information, Table S4 Primers for SNP markers used for linkage analysis of *cot***

| <b>NO.</b> | <b>Name of SNP marker</b> | <b>Forward primer</b>        | <b>Reverse primer</b>   |
|------------|---------------------------|------------------------------|-------------------------|
| 1          | 15035_3.7                 | TCGTTCCCTTGAGAGTGTCCA        | TGCACCTTCAGACTTGTACGTT  |
| 2          | 15105_9.5                 | TAATGAAGCGTGGAGATGGG         | CGTTAATGCGTTGTAATGCG    |
| 3          | 15006_16.4                | TTTTGAGGGGAGAAACACAA         | ACGGTTGCCCTACAAGGTTA    |
| 4          | 15034_16.4                | AATACCCGCGTGCTCACTAC         | TTCTTTTATGTTTGGCAAATCG  |
| 5          | 15107_17.4                | CCCCGGACAATACAGTCCTA         | GGAATTGTCCCACACTCCAC    |
| 6          | 15100_27.2                | ACAGGACCACCGAGTCAGAT         | AGACCCGTGTCCAGACAGAT    |
| 7          | 15007_36.0                | TTTCACGATCTTAATCGTCTTG       | GTTTCGCTCGTACTTTGGCTA   |
| 8          | 15057_36.6                | AGCATAATTTGATTTGAGTGATGTG    | TAGTGTGCCTGGTTGTGGTT    |
| 9          | 15011_19.0                | ACGTCGATCATGACTTTCCC         | ATCGCGAATTGCTAATGCTT    |
| 10         | 15003_19.5                | CCGAGTAGAGTTCATTGCG          | CGACTGGTCCCATTGTTTCT    |
| 11         | 15078_21.5                | GATCCTGGCTCAGGACGG           | GGTACTTTGTTGTTGGTGGCA   |
| 12         | 15002_22.0                | TGACTCTCTTTGCGTAATTTCTTT     | TTTCGATGAAATGAGGGGAC    |
| 13         | 15021_25.1                | TCAAGACGCGAACATTGGTA         | TGGAATGGCAACGATGAGTA    |
| 14         | 15028_25.6                | AAGGTCAAATTAACCTACTTAG<br>CA | TCCGAGAATGTGACATGTGATT  |
| 15         | chr15_Bm_scaf3_846621     | CGTTCAAATACCTTGGGAGA         | GCCCTTCGTTGAGTGAGTT     |
| 16         | chr15_Bm_scaf3_1251147    | TGTTATTCCGTTTCACCAG          | TGTCCAGGCATAAAGCACC     |
| 17         | chr15_Bm_scaf3_1684999    | CGATAGAAAAGCAAATGACG         | AGTCGTGCTTATCACATTCG    |
| 18         | chr15_Bm_scaf3_1743581    | CTGCGTATCACGGTTCCTT          | TCACCCTGAACACCTTACCT    |
| 19         | chr15_Bm_scaf3_1002769    | TTCCCTGAATGATAAGTTGC         | CCATGTGTTGACAGTTTGAAGAA |
| 20         | chr15_Bm_scaf3_1114648    | CCTTTTGACTTTTCAGTTGGA        | CCACATTCACATTTTCTCCC    |
| 21         | chr15_Bm_scaf3_1398039    | CACCGCTGTTGTTAGATAGG         | TTCGTATCCTTGTATCCGTCC   |
| 22         | chr15_Bm_scaf3_1504561    | CCTCTGACAATCATTGGACT         | TGATAAGGATAGCACGAAACAG  |
| 23         | chr15_Bm_scaf3_1586251    | CGACGACAACCTCGCTCGAACT       | CCGATTGACTTGAACTTGGT    |
| 24         | chr15_Bm_scaf3_1101731    | ATTCATTCCCCTTCTATCCA         | GGCAGTAGTGTTCGATAATGTG  |
| 25         | chr15_Bm_scaf3_1271214    | TTCAAGTCGCTATTGGAGTAA        | TGTTATTTGTTGCTTCCAGTC   |



**Supplementary information, Table S5 Primers for genomic PCR, RT-PCR and qRT-PCR**

| No. | Primer name       | Forward primer          | Reverse primer              |
|-----|-------------------|-------------------------|-----------------------------|
| 1   | <i>Bmsei</i> -p1  | GTCGGAGCACGGTGGGTT      | CTGCGGTCGCTCCCAACT          |
| 2   | <i>Bmsei</i> -p2  | ACCGCTGCCTTCTATTGCTC    | GCGAAATAAAGTATAGGGAGGTCA    |
| 3   | <i>Bmsei</i> -p3  | TCCCCGAGTGCCTCCAAG      | CGCAGGAATGATGTTGTGGC        |
| 4   | <i>Bmsei</i> -p4  | CAGCGCCACAACATCATTCC    | GCCCGCCTCACACCTACC          |
| 5   | <i>Bmsei</i> -p5  | GGTGGGTTTCGGTGAGGAC     | GATGGCTGGTAGCCGTTG          |
| 6   | <i>Bmsei</i> -p6  | GGTGGGTTTCGGTGAGGAC     | CGGATTCCACTTCGTCAGC         |
| 7   | <i>Bmsei</i> -p7  | GGCGAAGATCCCATTGTAG     | AACCTTTTTCCATGTCTGTGT       |
| 8   | <i>Bmsei</i> -p8  | ACCGCTGCCTTCTATTGC      | TTCTCGCCGAAAATGTCA          |
| 9   | <i>Bmsei</i> -p9  | ATTCAAGACAACCTCACGCTCCA | TTTGTCCGCAGAAAACCTCG        |
| 10  | <i>Bmsei</i> -p10 | ATGCGCTACGAGAATCCTTG    | GCCTGCTTAGTTCTTCCAATCT      |
| 11  | <i>Bmsei</i> -p11 | CGCCATCTTCTCGTTCTGC     | CCTGTAGAACGAGTGCAGT         |
| 12  | <i>Bmsei</i> G-1  | AGTGTAAGCGGAAGTAATAGTCG | CTTATGCGTTGCTTGCTTC         |
| 13  | <i>Bmsei</i> G-2  | TCAGAAAATTCGACTGGCTAT   | ATAAGGGCTCACTTCATCG         |
| 14  | <i>Bmsei</i> G-3  | ATTTTGCTTAGTTAGCGTGAT   | TTCGACTTCGCGTTACATAAT       |
| 15  | <i>Bmsei</i> G-4  | TATTCATGTTTTCAGAGCCCTC  | ATTTTTGGACCCTTTTTCACA       |
| 16  | <i>Bmsei</i> G-5  | TAAGTGAACCTTTGTCCAGG    | TGTGATGCATTCATTCTTAAC       |
| 17  | <i>Bmsei</i> G-6  | AGTGCATGATATTATGACGTTGT | AGGAAAGTTCTGGCGTCGTT        |
| 18  | <i>Bmsei</i> G-7  | CTGGGACATTTAGACGGACA    | ATAACTATTTATCCGAATACGTGTGTA |
| 19  | <i>BmRpl3</i> -1  | TCGTCATCGTGGTAAGGTCAA   | TTTGTATCCTTTGCCCTTGGT       |
| 20  | <i>BmRpl3</i> -2  | CGGTGTTGTTGGATAATTGAG   | GCTCATCCTGCCATTTCTTACT      |
| 21  | <i>Bmsei</i> -q8  | ATCTTCGTGGCTGGTTCGTCATA | CCAACTCCCGATAGCATAACGTAG    |
| 22  | <i>Bmsei</i> -q9  | ATCTTCGTGGCTGGTTCGTCATA | ACTCCCGATAGCATAACCATAAAC    |
